# Supplementary material for: Effective Extracorporeal Photopheresis of Patients with Transplantation Induced Acute Intestinal GvHD and Bronchiolitis Obliterans Syndrome
Source: MDPI journal article supplement (doi:10.3390/biomedicines10081887), 2022-08-04
Supplement: s1 [file s1]

Table S1. Clinical outcome patients with aGvHD

(NR = no significant response, PR = partial response, CR = complete response, a = alive, d = dead)

| Patient number | Onset intestinal aGvHD (days after aHSZT) | Grade intestinal aGvHD at beginning of ECP | Begin of ECP after diagnosis of aGvHD | ECP-cycles | Treatment duration in days | Treatment response | Begin response to ECP (in days) |          | Long term patient outcome | Cause of death            |
|----------------|-------------------------------------------|--------------------------------------------|---------------------------------------|------------|----------------------------|--------------------|---------------------------------|----------|---------------------------|---------------------------|
|                |                                           |                                            |                                       |            |                            |                    | partial                         | complete |                           |                           |
| 1              | 53                                        | 3                                          | 36                                    | 9          | 29                         | NR                 | -                               | -        | d                         | encephalopathy DD Sepsis  |
| 2              | 42                                        | 3                                          | 19                                    | 8          | 24                         | PR                 | 20                              | -        | d                         | Sepsis                    |
| 3              | 70                                        | 3                                          | 15                                    | 6          | 21                         | NR                 | -                               | -        | d                         | Acute toxic liver failure |
| 4              | 29                                        | 4                                          | 40                                    | 37         | 140                        | NR                 | -                               | -        | d                         | Sepsis                    |
| 5              | 25                                        | 2                                          | 62                                    | 25         | 98                         | PR                 | 66                              | -        | d                         | Sepsis                    |
| 6              | 36                                        | 4                                          | 21                                    | 26         | 128                        | CR                 | 32                              | 92       | d                         | Sepsis                    |
| 7              | 27                                        | 4                                          | 8                                     | 34         | 283                        | CR                 | 35                              | 78       | a                         | -                         |
| 8              | 108                                       | 4                                          | 13                                    | 9          | 32                         | PR                 | 12                              | -        | d                         | Sepsis                    |
| 9              | 121                                       | 4                                          | 42                                    | 17         | 80                         | NR                 | -                               | -        | d                         | Sepsis                    |
